# Supplementary material
Source: HighWire-hosted journal article supplement (https://www.jrheum.org/highwire/filestream/41621/field_highwire_adjunct_files/0/210543DataSuppl.pdf)
Supplement: 210543DataSuppl.pdf [file 210543DataSuppl.pdf]

**Supplementary Table 1. Categories of the PGA-OA.**

| <b>Category</b> | <b>Description</b>                                                                          |
|-----------------|---------------------------------------------------------------------------------------------|
| 1 – Very Good   | Asymptomatic and no limitations of normal activities                                        |
| 2 – Good        | Mild symptoms and no limitations of normal activities                                       |
| 3 – Fair        | Moderate symptoms and limitations of some normal activities                                 |
| 4 – Poor        | Severe symptoms and inability to carry out most normal activities                           |
| 5 – Very Poor   | Very severe symptoms which are intolerable and inability to carry out all normal activities |

PGA-OA: Patient Global Assessment of Osteoarthritis.

## Supplementary Figure 1. Relationship between change in WOMAC domains and PGA-OA in study 1.

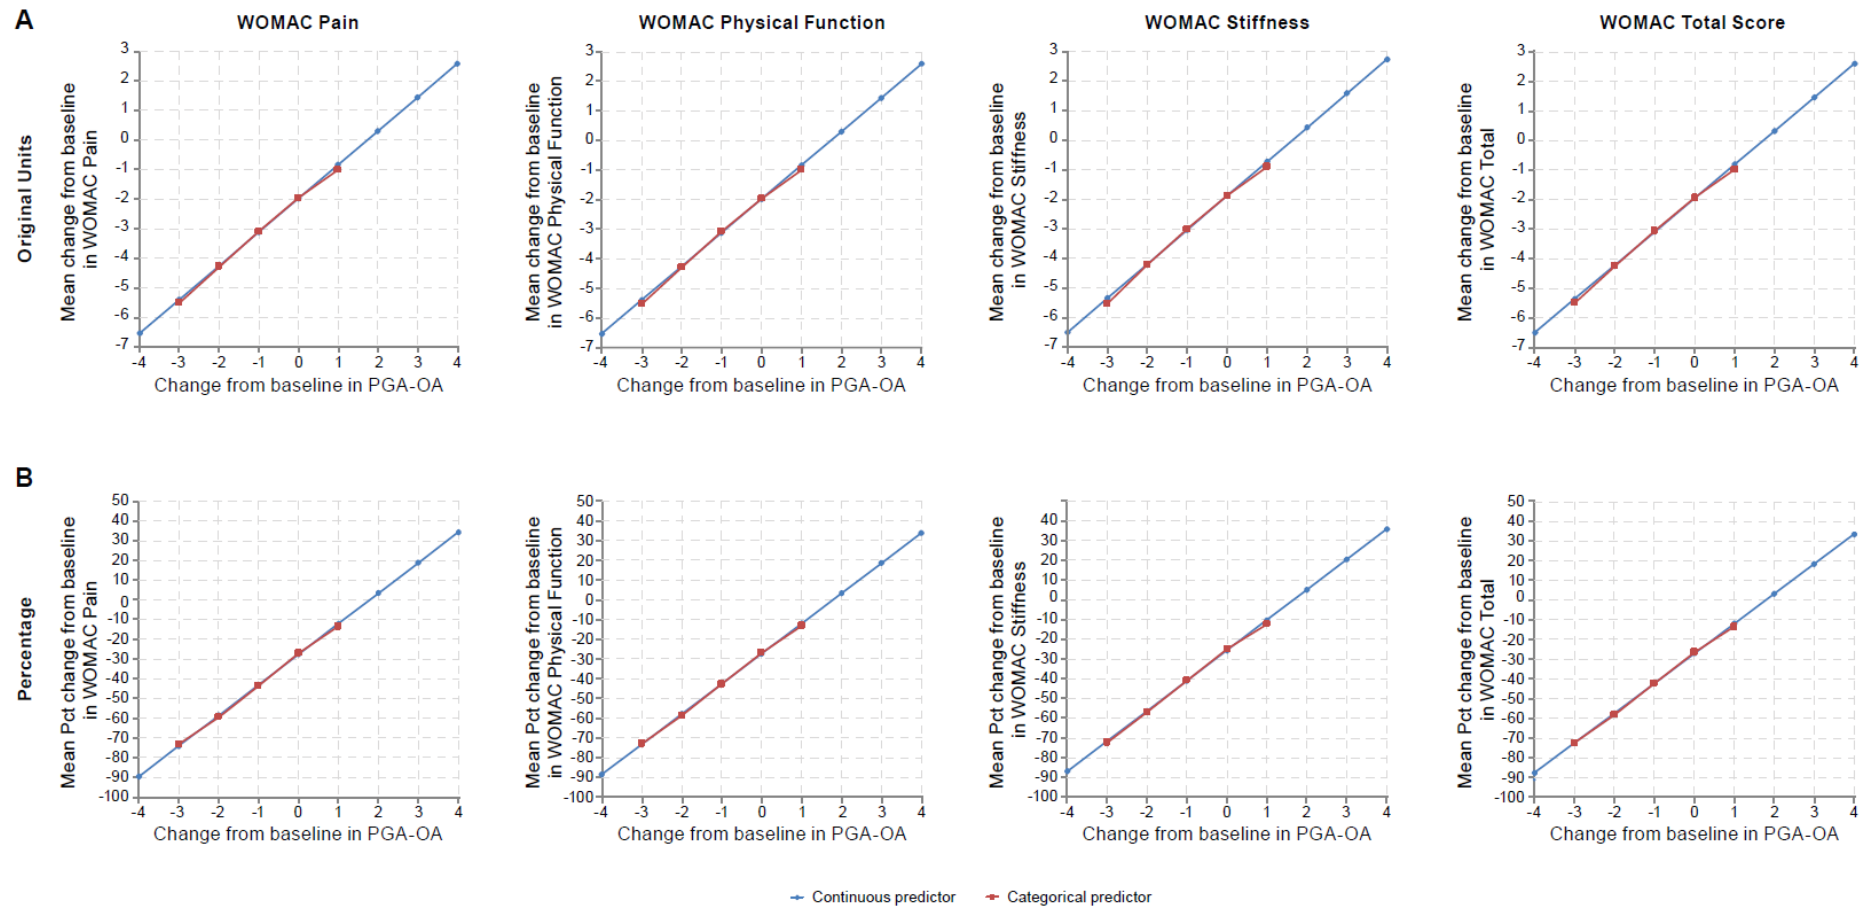

Using PGA-OA as a continuous variable (blue lines) or as a categorical variable (red lines) revealed an approximately linear relationship with all WOMAC domains in study 1. This relationship is observed when change in WOMAC is reported in original units

(A) or as a percentage (B). A negative change represents an improvement in both measures. Pct: percent; PGA-OA: Patient Global Assessment of Osteoarthritis; WOMAC: Western Ontario and McMaster Universities Osteoarthritis Index.

**Supplementary Figure 2. Relationship between change in WOMAC domains and PGA-OA in study 2.**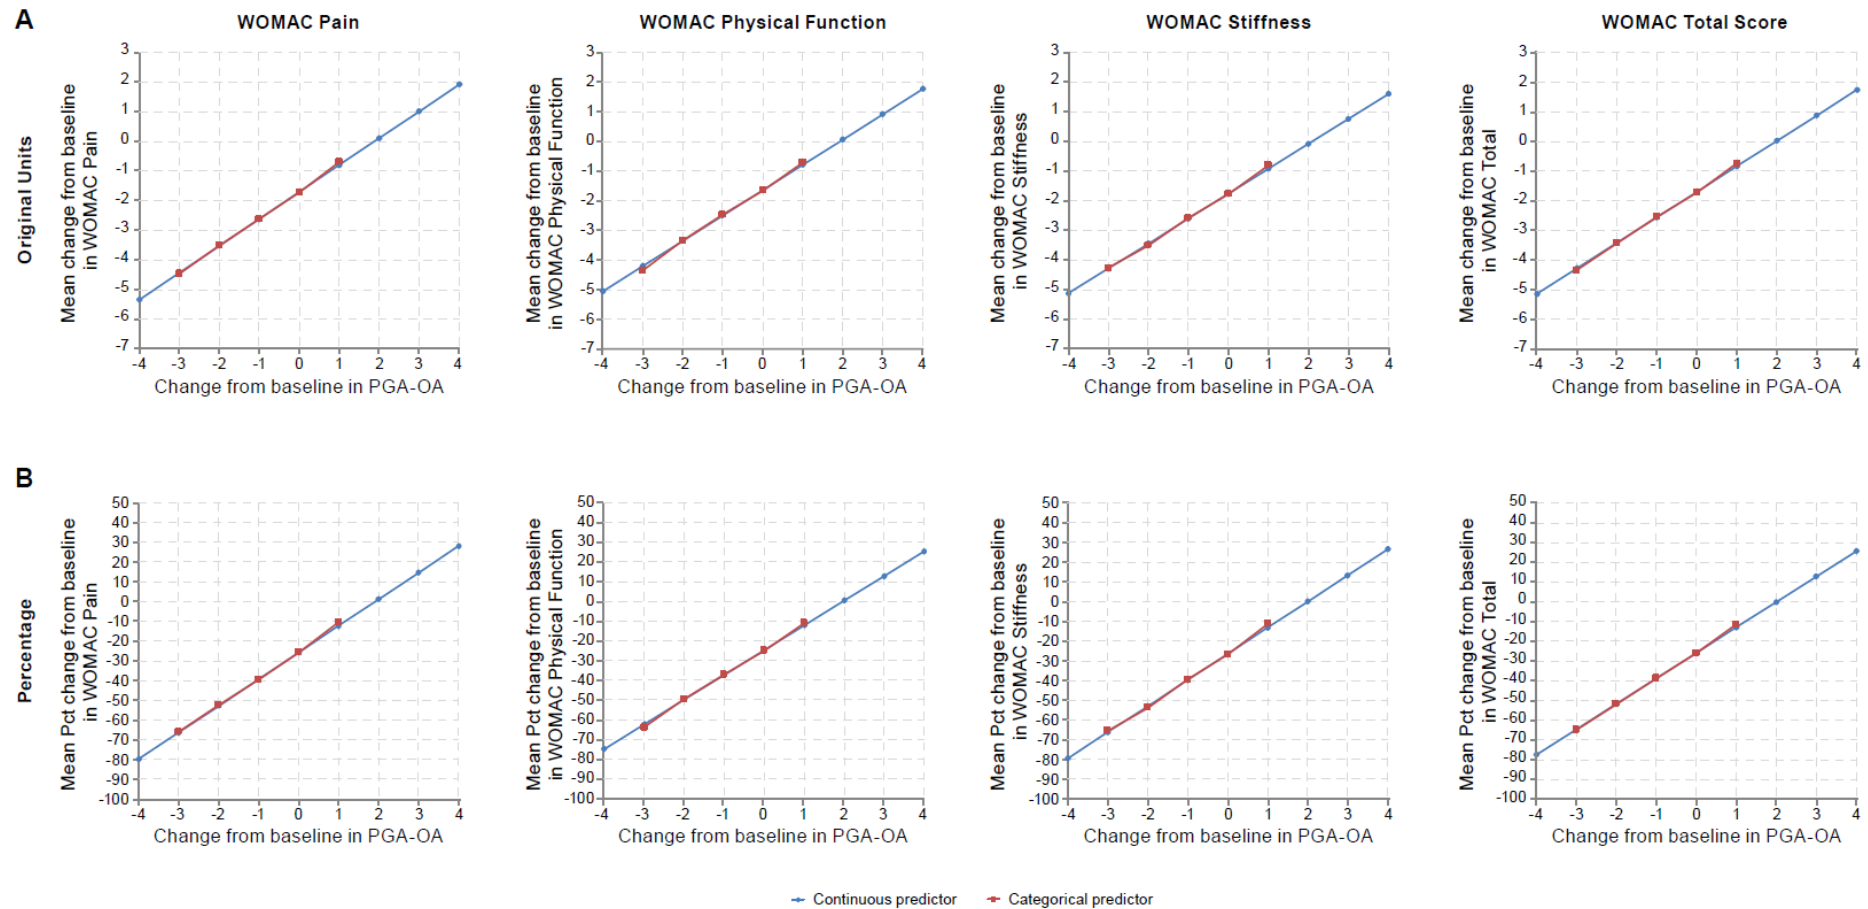

Using PGA-OA as a continuous variable (blue lines) or as a categorical variable (red lines) revealed an approximately linear relationship with all WOMAC domains in study 2. This relationship is observed when change in WOMAC is reported in original units

(A) or as a percentage (B). A negative change represents an improvement in both measures. Pct: percent; PGA-OA: Patient Global Assessment of Osteoarthritis; WOMAC: Western Ontario and McMaster Universities Osteoarthritis Index.

**Supplementary Table 2a. Estimates of meaningful within-patient change by WOMAC domain for each category of PGA-OA change in study 1 in original units.**

| Category<br>change in<br>PGA-OA | Pain     |                |                | Physical Function |                |                | Stiffness |                |                | Total    |                |                |
|---------------------------------|----------|----------------|----------------|-------------------|----------------|----------------|-----------|----------------|----------------|----------|----------------|----------------|
|                                 | Estimate | Lower<br>limit | Upper<br>limit | Estimate          | Lower<br>limit | Upper<br>limit | Estimate  | Lower<br>limit | Upper<br>limit | Estimate | Lower<br>limit | Upper<br>limit |
| -4                              | -6.54    | -6.75          | -6.32          | -6.53             | -6.74          | -6.32          | -6.51     | -6.75          | -6.26          | -6.49    | -6.70          | -6.28          |
| -3                              | -5.40    | -5.56          | -5.23          | -5.39             | -5.56          | -5.23          | -5.35     | -5.54          | -5.16          | -5.35    | -5.52          | -5.19          |
| -2                              | -4.26    | -4.39          | -4.12          | -4.25             | -4.38          | -4.12          | -4.19     | -4.34          | -4.05          | -4.22    | -4.35          | -4.09          |
| -1                              | -3.12    | -3.23          | -3.00          | -3.11             | -3.23          | -3.00          | -3.04     | -3.16          | -2.91          | -3.08    | -3.20          | -2.97          |
| 0                               | -1.98    | -2.10          | -1.85          | -1.97             | -2.10          | -1.85          | -1.88     | -2.02          | -1.74          | -1.95    | -2.07          | -1.82          |
| 1                               | -0.84    | -1.00          | -0.67          | -0.83             | -0.99          | -0.67          | -0.73     | -0.91          | -0.55          | -0.81    | -0.97          | -0.65          |
| 2                               | 0.30     | 0.10           | 0.51           | 0.31              | 0.10           | 0.51           | 0.43      | 0.19           | 0.66           | 0.33     | 0.13           | 0.53           |
| 3                               | 1.44     | 1.19           | 1.70           | 1.45              | 1.19           | 1.70           | 1.58      | 1.28           | 1.88           | 1.46     | 1.21           | 1.71           |
| 4                               | 2.58     | 2.27           | 2.89           | 2.59              | 2.28           | 2.89           | 2.74      | 2.38           | 3.10           | 2.60     | 2.30           | 2.90           |

PGA-OA: Patient Global Assessment of Osteoarthritis. Upper and lower limits of 95% confidence intervals shown for each value.

**Supplementary Table 2b. Estimates of meaningful within-patient change by WOMAC domain for each category of PGA-OA change in study 2 in original units.**

| Category<br>change in<br>PGA-OA | Pain     |                |                | Physical Function |                |                | Stiffness |                |                | Total    |                |                |
|---------------------------------|----------|----------------|----------------|-------------------|----------------|----------------|-----------|----------------|----------------|----------|----------------|----------------|
|                                 | Estimate | Lower<br>limit | Upper<br>limit | Estimate          | Lower<br>limit | Upper<br>limit | Estimate  | Lower<br>limit | Upper<br>limit | Estimate | Lower<br>limit | Upper<br>limit |
| -4                              | -5.35    | -5.53          | -5.16          | -5.06             | -5.23          | -4.88          | -5.13     | -5.35          | -4.91          | -5.14    | -5.32          | -4.97          |
| -3                              | -4.44    | -4.58          | -4.30          | -4.20             | -4.34          | -4.07          | -4.29     | -4.46          | -4.12          | -4.28    | -4.42          | -4.15          |
| -2                              | -3.53    | -3.63          | -3.42          | -3.35             | -3.45          | -3.25          | -3.45     | -3.57          | -3.32          | -3.42    | -3.52          | -3.32          |
| -1                              | -2.62    | -2.71          | -2.53          | -2.50             | -2.58          | -2.41          | -2.60     | -2.70          | -2.51          | -2.56    | -2.65          | -2.48          |
| 0                               | -1.71    | -1.80          | -1.61          | -1.64             | -1.73          | -1.55          | -1.76     | -1.87          | -1.65          | -1.70    | -1.79          | -1.61          |
| 1                               | -0.80    | -0.92          | -0.67          | -0.79             | -0.91          | -0.67          | -0.92     | -1.07          | -0.77          | -0.84    | -0.96          | -0.72          |
| 2                               | 0.11     | -0.05          | 0.28           | 0.07              | -0.09          | 0.22           | -0.08     | -0.28          | 0.12           | 0.02     | -0.13          | 0.18           |
| 3                               | 1.02     | 0.81           | 1.23           | 0.92              | 0.72           | 1.11           | 0.76      | 0.51           | 1.02           | 0.89     | 0.69           | 1.08           |
| 4                               | 1.93     | 1.67           | 2.19           | 1.77              | 1.53           | 2.01           | 1.61      | 1.29           | 1.92           | 1.75     | 1.51           | 1.99           |

PGA-OA: Patient Global Assessment of Osteoarthritis. Upper and lower limits of 95% confidence intervals shown for each value.

**Supplementary Table 2c. Estimates of meaningful within-patient change by WOMAC domain for each category of PGA-OA change in study 3 in original units.**

| Category<br>change in<br>PGA-OA | Pain     |                |                | Physical Function |                |                | Stiffness |                |                | Total    |                |                |
|---------------------------------|----------|----------------|----------------|-------------------|----------------|----------------|-----------|----------------|----------------|----------|----------------|----------------|
|                                 | Estimate | Lower<br>limit | Upper<br>limit | Estimate          | Lower<br>limit | Upper<br>limit | Estimate  | Lower<br>limit | Upper<br>limit | Estimate | Lower<br>limit | Upper<br>limit |
| -4                              | -6.63    | -6.72          | -6.53          | -6.58             | -6.67          | -6.48          | -6.60     | -6.70          | -6.49          | -6.53    | -6.62          | -6.43          |
| -3                              | -5.48    | -5.55          | -5.40          | -5.44             | -5.52          | -5.37          | -5.46     | -5.54          | -5.38          | -5.40    | -5.48          | -5.33          |
| -2                              | -4.33    | -4.38          | -4.27          | -4.31             | -4.37          | -4.25          | -4.32     | -4.39          | -4.26          | -4.28    | -4.33          | -4.22          |
| -1                              | -3.18    | -3.23          | -3.13          | -3.18             | -3.23          | -3.13          | -3.19     | -3.24          | -3.13          | -3.15    | -3.20          | -3.10          |
| 0                               | -2.03    | -2.08          | -1.97          | -2.05             | -2.10          | -1.99          | -2.05     | -2.11          | -1.99          | -2.03    | -2.08          | -1.97          |
| 1                               | -0.88    | -0.95          | -0.80          | -0.91             | -0.98          | -0.84          | -0.92     | -1.00          | -0.84          | -0.90    | -0.97          | -0.83          |
| 2                               | 0.28     | 0.18           | 0.37           | 0.22              | 0.13           | 0.31           | 0.22      | 0.11           | 0.32           | 0.22     | 0.13           | 0.31           |
| 3                               | 1.43     | 1.31           | 1.54           | 1.35              | 1.24           | 1.46           | 1.35      | 1.22           | 1.49           | 1.35     | 1.24           | 1.46           |
| 4                               | 2.58     | 2.44           | 2.72           | 2.48              | 2.35           | 2.62           | 2.49      | 2.33           | 2.65           | 2.47     | 2.34           | 2.61           |

PGA-OA: Patient Global Assessment of Osteoarthritis. Upper and lower limits of 95% confidence intervals shown for each value.



**Supplementary Table 3. Estimates of meaningful within-patient change for patients with an index hip by WOMAC domain and study in original units.**

| WOMAC Domain      | Study                             |                                   |                                   |                                   |                                   |                                   |
|-------------------|-----------------------------------|-----------------------------------|-----------------------------------|-----------------------------------|-----------------------------------|-----------------------------------|
|                   | 1                                 |                                   | 2                                 |                                   | 3                                 |                                   |
|                   | 1-Category<br>Change in<br>PGA-OA | 2-Category<br>Change in<br>PGA-OA | 1-Category<br>Change in<br>PGA-OA | 2-Category<br>Change in<br>PGA-OA | 1-Category<br>Change in<br>PGA-OA | 2-Category<br>Change in<br>PGA-OA |
| Pain              | 1.00<br>(0.83-1.16)               | 1.99<br>(1.66-2.32)               | 1.02<br>(0.89-1.14)               | 2.03<br>(1.78-2.28)               | 1.29<br>(1.21-1.36)               | 2.57<br>(2.42-2.73)               |
| Physical Function | 0.93<br>(0.77-1.10)               | 1.87<br>(1.54-2.19)               | 0.89<br>(0.76-1.01)               | 1.77<br>(1.53-2.01)               | 1.22<br>(1.14-1.29)               | 2.43<br>(2.29-2.57)               |
| Stiffness         | 1.09<br>(0.90-1.27)               | 2.17<br>(1.80-2.54)               | 0.94<br>(0.78-1.10)               | 1.87<br>(1.56-2.19)               | 1.14<br>(1.06-1.23)               | 2.29<br>(2.13-2.46)               |
| Total             | 0.99<br>(0.84-1.45)               | 1.99<br>(1.68-2.29)               | 0.94<br>(0.82-1.06)               | 1.88<br>(1.64-2.11)               | 1.21<br>(1.13-1.28)               | 2.41<br>(2.27-2.55)               |

PGA-OA: Patient Global Assessment of Osteoarthritis; WOMAC: Western Ontario and McMaster Universities Osteoarthritis Index.

95% confidence intervals shown for each value.

**Supplementary Table 4. Estimates of meaningful within-patient change for patients with an index knee by WOMAC domain and study in original units.**

| WOMAC Domain      | Study                             |                                   |                                   |                                   |                                   |                                   |
|-------------------|-----------------------------------|-----------------------------------|-----------------------------------|-----------------------------------|-----------------------------------|-----------------------------------|
|                   | 1                                 |                                   | 2                                 |                                   | 3                                 |                                   |
|                   | 1-Category<br>Change in<br>PGA-OA | 2-Category<br>Change in<br>PGA-OA | 1-Category<br>Change in<br>PGA-OA | 2-Category<br>Change in<br>PGA-OA | 1-Category<br>Change in<br>PGA-OA | 2-Category<br>Change in<br>PGA-OA |
| Pain              | 1.16<br>(1.10-1.22)               | 2.32<br>(2.19-2.44)               | 0.89<br>(0.83-0.94)               | 1.78<br>(1.67-1.89)               | 1.13<br>(1.10-1.16)               | 2.25<br>(2.20-2.31)               |
| Physical Function | 1.17<br>(1.11-1.23)               | 2.34<br>(2.21-2.46)               | 0.85<br>(0.80-0.90)               | 1.69<br>(1.59-1.80)               | 1.12<br>(1.09-1.15)               | 2.24<br>(2.18-2.29)               |
| Stiffness         | 1.16<br>(1.09-1.24)               | 2.33<br>(2.18-2.48)               | 0.82<br>(0.76-0.89)               | 1.65<br>(1.51-1.78)               | 1.13<br>(1.10-1.17)               | 2.27<br>(2.20-2.33)               |
| Total             | 1.16<br>(1.09-1.22)               | 2.31<br>(2.19-2.43)               | 0.85<br>(0.80-0.90)               | 1.69<br>(1.59-1.80)               | 1.11<br>(1.08-1.14)               | 2.22<br>(2.17-2.28)               |

PGA-OA: Patient Global Assessment of Osteoarthritis; WOMAC: Western Ontario and McMaster Universities Osteoarthritis Index.

95% confidence intervals shown for each value.
